# Supplementary material for: Impact of reduced anthropogenic emissions during COVID-19 on air quality in India
Source: Copernicus journal article supplement (doi:10.5194/acp-2020-903), 2020-10-09
Supplement: Supplementary file [file acp-2020-903-AC1-supplement.pdf]

# Responses to interactive comments

**Journal:** Atmospheric Chemistry and Physics

**Manuscript ID:** acp-2020-903

**Title:** “Impact of reduced anthropogenic emissions during COVID-19 on air quality in India”

Dear Referee #2,

We appreciate your comments to help improve the manuscript. We tried our best to address your comments and detailed responses and related changes are shown below. Our response is in blue and the modifications in the manuscript are in red.

**Comments:** The manuscript presents a topical research, i.e. to understand the air quality change in India during the COVID-19 lockdown period. The reported ozone and PM changes from the ground-based observations reveal the sensitivity of major pollutions to the drastic emission reduction in India which is one of the most polluted regions in the world. The WRF-CMAQ model simulations further shed light on the relative contributions from primary emissions and secondary formation of aerosols. The manuscript is easy to follow and fit to the scope of ACP very well. I recommend its publication with ACP, while I also have comments below for the authors to address.

**Response:** Thanks for the recognition of our study. Below is the response to each specific comment.

**Comments:** The major results of this study are based on the comparison between the Lockdown and Pre-lockdown periods. Figs. 1-3 show observed changes in PM and ozone. I’m wondering how different the meteorological conditions are during those two periods? The recent COVID-19-related studies (e.g. Le et al., 2020, Science) have stressed the importance of ventilation conditions and relative humidity in regulating the air pollution at the short time scale. Since the authors have obtain the meteorological data and conducted WRF simulations, it should be a low-hanging fruit to perform a more comparative analysis of meteorology (precipitation, winds, PBL height, etc.), in addition to the present Fig. S2 of temperature comparison. The outcome of this analysis should be also discussed in the context with the recent studies focusing on the air quality changes during the COVID-19.

**Response:**

Thanks for the comments. Considering the important influence of meteorological conditions, we added more analysis on their differences between pre-lockdown and lockdown periods including temperature (T), relative humidity (RH), planetary boundary layer (PBL) height, the average daily precipitation, and wind fields in below Fig. 1 (also added as Fig.S3 in the revised supplement). We also explained the impacts of these meteorological conditions on air quality in the Results and Discussion section.

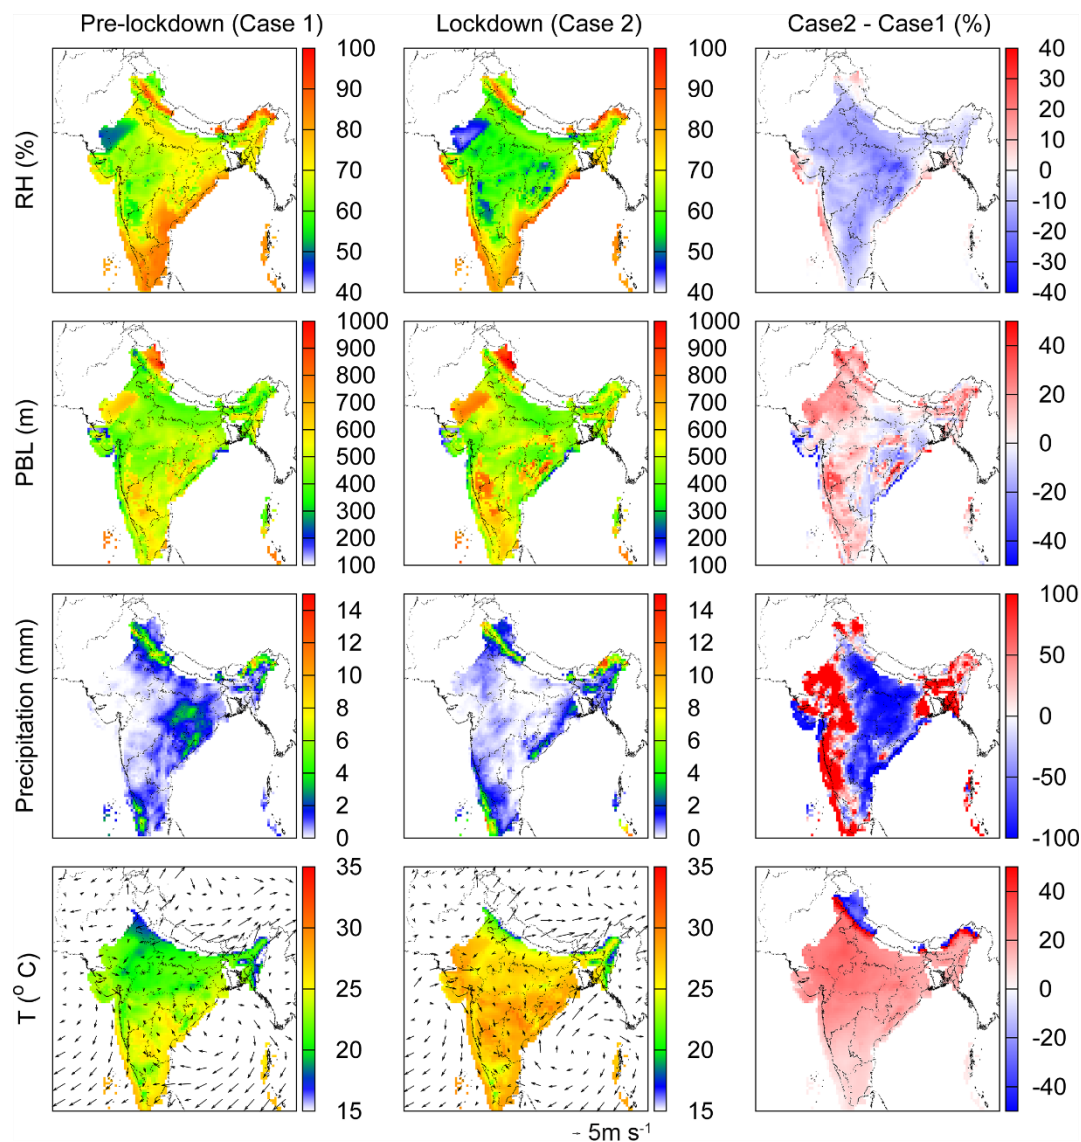

**Figure 1: Distribution of simulated temperature (T), relative humidity (RH), planetary boundary layer (PBL) height, the average daily precipitation, and wind fields in India before and during the lockdown period. “Case2 - Case1” indicates (Case 2 – Case 1)/Case 1, reported as %.**

**Changes in manuscript:**

**Results and discussion (Lines 199-203 in the revision):** “Variations in near-surface meteorological

factors during lockdown also play an important role in  $PM_{2.5}$  changes. As is shown in Fig. S3, lower  $PM_{2.5}$  in urban areas during lockdown (Fig. 4) may attribute to the decrease of RH and increase of planetary boundary layer (PBL) height, while the decrease of precipitation and WS allows  $PM_{2.5}$  to accumulate in some rural areas (Schnell et al., 2018; Le et al., 2020).”

**Results and discussion (Lines 207-211 in the revision):** “Although significant reductions are found in  $O_3$  precursor emissions throughout India during the lockdown, the MDA8  $O_3$  has not shown comparable decreasing trends, which is affected by the meteorological conditions such as an increase of temperature and decrease of RH (Fig. S3). Higher temperature speeds up photochemical processes that produce  $O_3$ , while higher RH reduces them (Chen et al., 2019; Zhao et al., 2017; Ali et al., 2012).”

**Comments:** There is no doubt that HCHO is closely linked with VOCs, but it is unclear to me how well the HCHO can be used to represent the total VOCs in a quantitative manner. Can the authors show their correlations based on the CMAQ model results?

**Response:**

As one of the most abundant oxygenated VOCs, HCHO is one of the major contributors to total VOCs reactivity (Zhang et al., 2012; Steiner et al., 2008). Therefore, it is used to show the model performance on VOCs due to the lack of VOCs observations. Figure 2 (added as Fig.S4 in the revised supplement) shows scatter plots comparing the simulated average daily HCHO and the total VOCs at all  $117 \times 117$  grids during the study period. It can be seen from the results that HCHO has a high correlation with VOCs, and  $R^2$  reaches 0.93. We added explanations in the manuscript to make it clear.

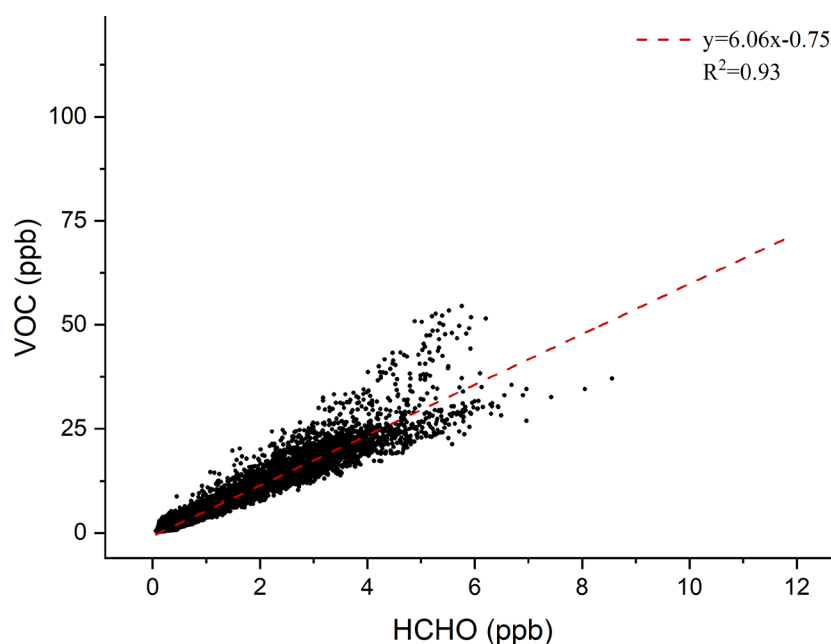

**Figure 2:** Scatter plots comparing the simulated average daily HCHO and the total VOCs at all 117×117 grids from February 21 to April 24, 2020.

**Changes in manuscript:**

**Results and discussion (Lines 267-269 in the revision):** “We investigated the changes of MDA8 O<sub>3</sub> and its major precursors NO<sub>x</sub> and HCHO that is one of the major contributors to total VOCs reactivity (Zhang et al., 2012; Steiner et al., 2008) during the lockdown period. Figure S4 shows that HCHO has a strong correlation with total VOCs (R up to 0.93).”

**Comments:** Spaceborne measurements of HCHO and NO<sub>2</sub> are available from the latest satellites, such as TROPOMI. There are near-real-time products. The authors may want to explore those data and validate the modeled HCHO and NO<sub>2</sub> and see their changes in observations.

**Response:**

Thank you for this good suggestion. To validate the modeled HCHO and NO<sub>2</sub>, we compared our simulated results with satellite-observed NO<sub>2</sub> and HCHO column number density datasets from TROPOMI during pre-lockdown and lockdown periods (Fig. 3, added as Fig. S1 in the revised supplement). As shown in Fig. 3, the predicted regional distribution of NO<sub>2</sub> and HCHO column number densities is similar to satellite-observations. Overall, HCHO and NO<sub>2</sub> are higher in eastern and northern India than in other regions. And their variation trends from CMAQ and TROPOMI are consistent that NO<sub>2</sub> decreases while HCHO increases during the lockdown.

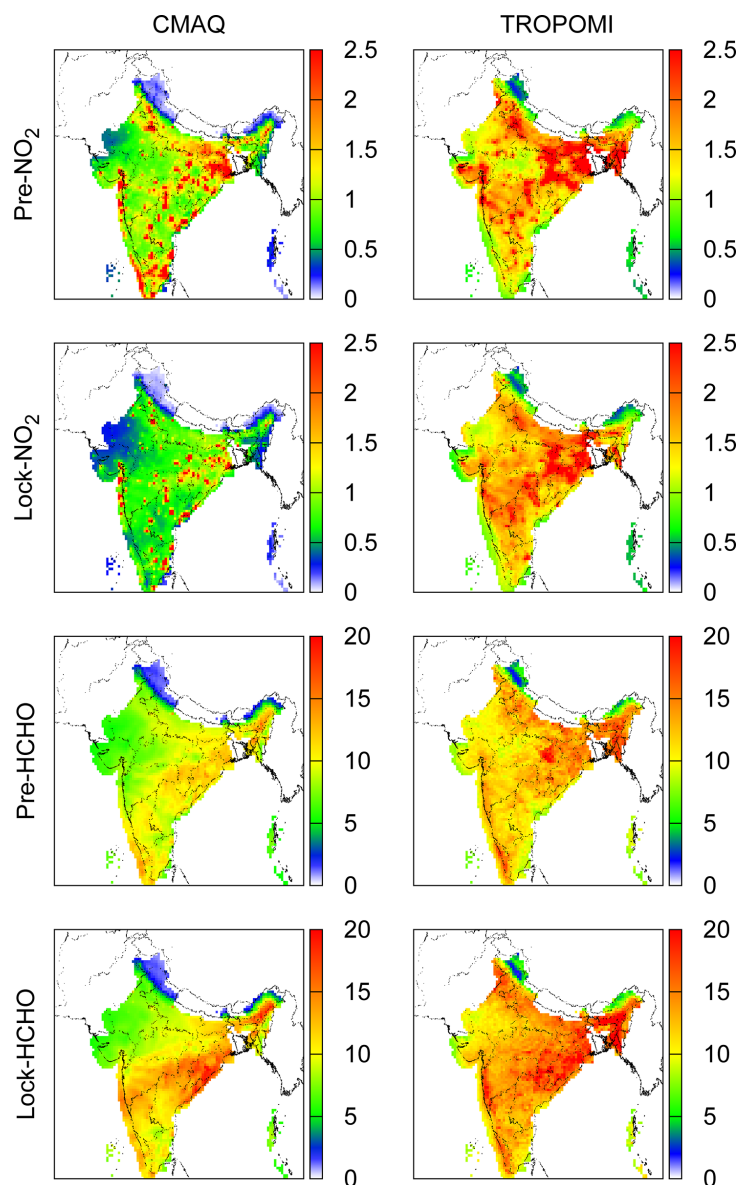

**Figure 3: Comparison of the simulated and satellite-observed NO<sub>2</sub> and HCHO column concentrations before lockdown and during the lockdown in India. The unit is  $10^{15}$  molec cm<sup>-2</sup>.**

**Changes in manuscript:**

**Methodology (Lines 85-89 in the revision):** “The satellite-observed NO<sub>2</sub> and formaldehyde (HCHO) column number density datasets are from the Sentinel-5 Precursor TROPOspheric Monitoring Instrument (S-5P TROPOMI) (<https://scihub.copernicus.eu>). Besides, we filter the satellite data under the recommended criteria of QA values greater than 75% for tropospheric NO<sub>2</sub> column number density datasets and 50% for HCHO (Apituley, 2018).”

**Results and discussion (Lines 158-163 in the revision):** “To further validate modeled HCHO and NO<sub>2</sub>, we compared our simulated results with satellite-observed data during pre-lockdown and lockdown

periods (Fig. S1). The tropospheric column densities of NO<sub>2</sub> and HCHO were calculated by summing their concentrations of 17 vertical layers in the CMAQ model (H. J. Eskes, 2020). The predicted regional distribution of tropospheric column NO<sub>2</sub> and HCHO is similar to satellite-observations. Overall, HCHO and NO<sub>2</sub> are higher in eastern and northern India than in other regions. And their variation trends from CMAQ and TROPOMI are consistent that NO<sub>2</sub> decreases while HCHO increases during the lockdown.”

## Reference

- Ali, K., Inamdar, S. R., Beig, G., Ghude, S., and Peshin, S.: Surface ozone scenario at Pune and Delhi during the decade of 1990s, *Journal of Earth System Science*, 121, 373-383, <https://doi.org/10.1007/s12040-012-0170-1>, 2012.
- Apituley, A., Pedernana, M., Sneep, M., Pepijn Veeffkind, J., Loyola, D., Landgraf, J., Borsdorff, T.: Sentinel-5 Precursor/TROPOMI Level 2 Product User Manual Carbon Monoxide, . Royal Netherlands Meteorological Institute., 2018.
- Chen, Z., Zhuang, Y., Xie, X., Chen, D., Cheng, N., Yang, L., and Li, R.: Understanding long-term variations of meteorological influences on ground ozone concentrations in Beijing During 2006–2016, *Environmental Pollution*, 245, 29-37, <https://doi.org/10.1016/j.envpol.2018.10.117>, 2019.
- S5P Mission Performance Centre Nitrogen Dioxide [L2\_NO2\_\_\_] Readme: <https://sentinel.esa.int/documents/247904/3541451/Sentinel-5P-Nitrogen-Dioxide-Level-2-Product-Readme-File>, 2020.
- Le, T., Wang, Y., Liu, L., Yang, J., Yung, Y. L., Li, G., and Seinfeld, J. H.: Unexpected air pollution with marked emission reductions during the COVID-19 outbreak in China, *Science*, 369, 702, <https://doi.org/10.1126/science.abb7431>, 2020.
- Schnell, J. L., Naik, V., Horowitz, L. W., Paulot, F., Mao, J., Ginoux, P., Zhao, M., and Ram, K.: Exploring the relationship between surface PM<sub>2.5</sub> and meteorology in Northern India, *Atmospheric Chemistry and Physics*, 18, 10157-10175, <https://doi.org/10.5194/acp-18-10157-2018>, 2018.
- Steiner, A. L., Cohen, R. C., Harley, R. A., Tonse, S., Millet, D. B., Schade, G. W., and Goldstein, A. H.: VOC reactivity in central California: comparing an air quality model to ground-based measurements, *Atmos. Chem. Phys.*, 8, 351-368, <https://doi.org/10.5194/acp-8-351-2008>, 2008.
- Zhang, Q., Shao, M., Li, Y., Lu, S. H., Yuan, B., and Chen, W. T.: Increase of ambient formaldehyde in Beijing and its implication for VOC reactivity, *Chinese Chemical Letters*, 23, 1059-1062,

<https://doi.org/10.1016/j.cclet.2012.06.015>, 2012.

Zhao, B., Wu, W., Wang, S., Xing, J., Chang, X., Liou, K.-N., Jiang, J. H., Gu, Y., Jang, C., Fu, J. S., Zhu, Y., Wang, J., Lin, Y., and Hao, J.: A modeling study of the nonlinear response of fine particles to air pollutant emissions in the Beijing–Tianjin–Hebei region, *Atmospheric Chemistry and Physics*, 17, 12031-12050, <https://doi.org/10.5194/acp-17-12031-2017>, 2017.
